# Supplementary material for: A Comparison of the Meat Quality, Nutritional Composition, Carcass Traits, and Fiber Characteristics of Different Muscular Tissues between Aged Indigenous Chickens and Commercial Laying Hens
Source: MDPI journal article supplement (doi:10.3390/foods12193680), 2023-10-07
Supplement: s1 [file s1]

**Table S1.** Dietary composition and nutritional content of HLG and GYG.

| <b>Ingredient (%)</b> | <b>Rearing stage (%)</b> | <b>Laying stage (%)</b> |
|-----------------------|--------------------------|-------------------------|
| Corn                  | 63.00                    | 59.80                   |
| Soybean meal (sol.)   | 11.50                    | 12.80                   |
| Maize gluten meal     | 3.00                     | 5.00                    |
| Wheat bran            | 7.00                     | 4.40                    |
| Rapeseed meal (sol.)  | 8.00                     | 7.00                    |
| Soybean oil           | 2.80                     | 3.30                    |
| Dicalcium phosphate   | 1.20                     | 1.00                    |
| Limestone             | 1.00                     | 4.20                    |
| Premixes <sup>a</sup> | 2.50                     | 2.50                    |
| Nutrition content     |                          |                         |
| ME (MJ/Kg)            | 12.15                    | 12.14                   |
| CP (%)                | 16.22                    | 17.01                   |
| Calcium (%)           | 0.85                     | 2.00                    |
| Available P (%)       | 0.4                      | 0.34                    |
| Lys (%)               | 0.64                     | 0.66                    |
| Met (%)               | 0.29                     | 0.31                    |

<sup>a</sup> Premix included the following per kg of feed: Vitamin A ≥ 390 KIU, Vitamin D3 ≥ 150 KIU, Vitamin E ≥ 1240, Vitamin B ≥ 185, Vitamin B2 ≥ 260, Vitamin B6 ≥ 160, Vitamin B12 ≥ 1.2, Vitamin K3 ≥ 100, D-biotin ≥ 12, D-pantothenic acid ≥ 470, Folic acid ≥ 57, niacin ≥ 1660, Hydrogenated choline ≥ 15,000, methionine ≥ 43,000, Fe ≥ 2000, Cu ≥ 380, Mn ≥ 3900, Zn ≥ 2800, I ≥ 25, Se ≥ 10.
